# Supplementary material for: T-Cell Costimulation Protects Obesity-Induced Adipose Inflammation and Insulin Resistance
Source: PubMed Central journal article supplement — Diabetes. 2014 Mar 13;63(4):1289–302. doi: 10.2337/db13-1094 (PMC4179314; doi:10.2337/db13-1094), 2014-03-13
Supplement: supp_db13-1094_DB131094SupplementaryData.pdf [file supp_db13-1094_DB131094SupplementaryData.pdf]

SUPPLEMENTARY DATA

**Supplementary Table 1.** Real-time PCR primer sequence.

| Target Gene  |         | Primer Sequence (5' to 3') |
|--------------|---------|----------------------------|
| TNF $\alpha$ | Forward | CAACGGCATGGATCTCAAAGAC     |
|              | Reverse | AGATAGCAAATCGGCTGACGGT     |
| MCP-1        | Forward | TCACCTGCTGCTACTCATTACCA    |
|              | Reverse | TACAGCTTCTTTGGGACACCTGCT   |
| Foxp3        | Forward | ACACCCAGGAAAGACAGCAACC     |
|              | Reverse | CCTCGAAGACCTTCTCACAACC     |
| IL-10        | Forward | TAGAGCTGCGGACTGCCTTCA      |
|              | Reverse | ATGCTCCTTGATTCTGGGCCAT     |
| 18s rRNA     | Forward | AACACAGGGATCGGACAAC        |
|              | Reverse | CAGTCATATTGCCAGTCCCAG      |

**Supplementary Table 2.** Baseline metabolic data of patients recruited in this study.

|                             | VAT Lean                                       | VAT Obese                                      | SAT Lean                                       | SAT Obese                                      |
|-----------------------------|------------------------------------------------|------------------------------------------------|------------------------------------------------|------------------------------------------------|
| Number of Patients          | 9                                              | 18                                             | 4                                              | 5                                              |
| Age (year)                  | 44.44 $\pm$ 6.20                               | 46.19 $\pm$ 2.49                               | 40.25 $\pm$ 4.55                               | 42.40 $\pm$ 2.71                               |
| BMI                         | 25.48 $\pm$ 0.73                               | 53.01 $\pm$ 2.47                               | 22.25 $\pm$ 0.48                               | 32.0 $\pm$ 0.85                                |
| Blood Glucose (mg/dl)       | 99.78 $\pm$ 4.94                               | 106.29 $\pm$ 9.67                              | 88.5 $\pm$ 4.09                                | 84.0 $\pm$ 2.79                                |
| Total Cholesterol (mg/dl)   | 159.44 $\pm$ 12.75                             | 165.79 $\pm$ 10.12                             | 166 $\pm$ 11.07                                | 196.8 $\pm$ 19.10                              |
| Non-HDL Cholesterol (mg/dl) | 105.00 $\pm$ 10.11                             | 122.79 $\pm$ 10.09                             | 137.25 $\pm$ 31.30                             | 131.60 $\pm$ 10.38                             |
| emA1c (%)                   | 5.80 $\pm$ 0.22%<br>(40 $\pm$ 2.4<br>mmol/mol) | 5.74 $\pm$ 0.29%<br>(39 $\pm$ 3.2<br>mmol/mol) | 5.18 $\pm$ 0.33%<br>(33 $\pm$ 3.6<br>mmol/mol) | 5.30 $\pm$ 0.09%<br>(34 $\pm$ 1.0<br>mmol/mol) |
| CRP (mg/L)                  | 5.83 $\pm$ 1.62                                | 11.06 $\pm$ 3.03                               | 1.52 $\pm$ 0.59                                | 6.87 $\pm$ 5.15                                |

Data are presented as Mean  $\pm$  SEM. VAT Lean, visceral adipose tissue from lean patients; VAT Obese, visceral adipose tissue from obese patients; SAT Lean, subcutaneous adipose tissue from lean patients; SAT Obese, subcutaneous adipose tissue from obese patients; BMI, body mass index; CRP, C-reactive protein.
